# Supplementary material for: Uncovering Bupi Yishen Formula Pharmacological Mechanisms Against Chronic Kidney Disease by Network Pharmacology and Experimental Validation
Source: Front Pharmacol. 2021 Nov 15;12:761572. doi: 10.3389/fphar.2021.761572 (PMC8634166; doi:10.3389/fphar.2021.761572)
Supplement: Supplementary file 2 [file Table3.XLSX]

## Sheet: Sheet1
SUPPLEMENTARY TABLE S3. Potential targets of active compounds in BYF
active compound	target
D-Camphene	ZPR1
Hemo-sol	ZPR1
alpha-humulene	ZPR1
beta-Humulene	ZPR1
beta-Selinene	ZPR1
beta-caryophyllene	ZPR1
γ-elemene	ZPR1
alloaromadedrene	ZPR1
Squalene	ZPR1
beta-Chamigrene	ZPR1
(-)-alpha-Pinene	ZPR1
()-beta-Pinene	ZPR1
beta-Curcumene	ZPR1
bulnesene	ZPR1
Stigmasterol	ZPR1
(6Z,10E,14E,18E)-2,6,10,15,19,23-hexamethyltetracosa-2,6,10,14,18,22-hexaene	ZPR1
Gulutamine	ZP4
Nonanol	ZP4
L-Lysin	ZP4
alpha-Curcumene	ZP3
Gulutamine	ZP3
(+)-alpha-Curcumene	ZP3
Nonanol	ZP3
L-Lysin	ZP3
EIC	ZNF536
poricoic acid C	ZNF536
2-lauroleic acid	ZNF536
alpha-Curcumene	ZNF219
(+)-alpha-Curcumene	ZNF219
LUPENONE	ZFPM1
NSC63551	ZFPM1
LUPENONE	ZFP42
NSC63551	ZFP42
Coixan A	YWHAH
LUPENONE	YWHAE
Denudatin B	YWHAE
Kadsurenone	YWHAE
NSC63551	YWHAE
Coixan A	YWHAE
Prolinum	YTHDC2
C09092	YBX3
Azelex	YBX3
myristic acid	YBX3
Undekansaeure	YBX3
caprylic acid	YBX3
lauric acid	YBX3
palmitic acid	YBX3
Docosanoate	YBX3
hexanoic acid	YBX3
Gulutamine	YARS2
danshensu	YARS2
LDP	YARS2
L-Lysin	YARS2
danshensu	YARS
LDP	YARS
LUPENONE	XRCC6BP1
NSC63551	XRCC6BP1
Coixan A	XRCC5
LUPENONE	XRCC4
NSC63551	XRCC4
Coixan A	XPO1
apigenin	XIAP
luteolin	XIAP
quercetin	XDH
coumarin	XDH
kaempferol	XDH
isorhamnetin	XDH
luteolin	XDH
L-uridine	XDH
caprylic acid	XDH
palmitic acid	XDH
gamma-aminobutyric acid	XDH
choline	XDH
Flavaxin	XDH
FA	XDH
LUPENONE	XCL1
NSC63551	XCL1
2-isopropyl-8-methylphenanthrene-3,4-dione	WT1
Miltirone	WT1
Gulutamine	WNT7B
L-Lysin	WNT7B
beta-Eudesmol	WNT5A
Hinesol	WNT5A
sugiol	WNT5A
sclareol	WNT5A
manool	WNT5A
NSC 122421	WNT5A
Salvinone	WNT5A
LUPENONE	WNT5A
NSC63551	WNT5A
(R)-linalool	WNT5A
α-Amyrin	WNT4
beta-Eudesmol	WNT4
(3S,8S,9S,10R,13R,14S,17R)-10,13-dimethyl-17-[(2R,5S)-5-propan-2-yloctan-2-yl]-2,3,4,7,8,9,11,12,14,15,16,17-dodecahydro-1H-cyclopenta[a]phenanthren-3-ol	WNT4
Hinesol	WNT4
Poriferasterol	WNT4
poriferast-5-en-3beta-ol	WNT4
sugiol	WNT4
α-amyrin	WNT4
sclareol	WNT4
dan-shexinkum b	WNT4
dan-shexinkum c	WNT4
deoxyneocryptotanshinone	WNT4
manool	WNT4
microstegiol	WNT4
miltionone Ⅰ	WNT4
NSC 122421	WNT4
Tanshiquinone B	WNT4
Salvinone	WNT4
gamma-sitosterol	WNT4
Stigmasterol	WNT4
poriferasta-7,22E-dien-3beta-ol	WNT4
ZINC03978781	WNT4
Spinasterol	WNT4
Taraxerol	WNT4
ergosta-7,22E-dien-3beta-ol	WNT4
ergosterol	WNT4
lupeol	WNT4
LUPENONE	WNT4
γ-sitosterol	WNT4
Isofucosterol	WNT4
CLR	WNT4
beta-sitosterol	WNT4
NSC63551	WNT4
(R)-linalool	WNT4
Amyrin	WNT4
campest-5-en-3beta-ol	WNT4
Quercetin-3-O-Galactoside-7-O-Glucoside	WNT4
Sitosterol alpha1	WNT4
isoarborinol	WNT4
sitosterol	WNT4
campesterol	WNT4
dan-shexinkum b	WNT2B
dan-shexinkum c	WNT2B
deoxyneocryptotanshinone	WNT2B
C09092	WNT2B
miltionone Ⅰ	WNT2B
Tanshiquinone B	WNT2B
dan-shexinkum b	WNT2
dan-shexinkum c	WNT2
deoxyneocryptotanshinone	WNT2
C09092	WNT2
miltionone Ⅰ	WNT2
Tanshiquinone B	WNT2
EIC	WNT11
2-isopropyl-8-methylphenanthrene-3,4-dione	WNT11
dan-shexinkum b	WNT11
dan-shexinkum c	WNT11
deoxyneocryptotanshinone	WNT11
miltionone Ⅰ	WNT11
Miltirone	WNT11
Tanshiquinone B	WNT11
poricoic acid C	WNT11
2-lauroleic acid	WNT11
Azelex	WNT10B
myristic acid	WNT10B
Undekansaeure	WNT10B
caprylic acid	WNT10B
lauric acid	WNT10B
palmitic acid	WNT10B
Docosanoate	WNT10B
LUPENONE	WNT10B
NSC63551	WNT10B
hexanoic acid	WNT10B
alpha-Curcumene	WNK4
(+)-alpha-Curcumene	WNK4
2-isopropyl-8-methylphenanthrene-3,4-dione	WLS
Miltirone	WLS
dan-shexinkum b	WHSC1
dan-shexinkum c	WHSC1
deoxyneocryptotanshinone	WHSC1
miltionone Ⅰ	WHSC1
Tanshiquinone B	WHSC1
EIC	WDR77
poricoic acid C	WDR77
2-lauroleic acid	WDR77
FA	WDHD1
Istidina	WARS2
L-Lysin	WARS2
Istidina	WARS
L-Lysin	WARS
LUPENONE	VTI1A
NSC63551	VTI1A
2-isopropyl-8-methylphenanthrene-3,4-dione	VKORC1L1
Miltirone	VKORC1L1
quercetin	VKORC1L1
2-isopropyl-8-methylphenanthrene-3,4-dione	VKORC1
Miltirone	VKORC1
apigenin	VKORC1
daidzein	VKORC1
kaempferol	VKORC1
coumarin	VKORC1
quercetin	VKORC1
LDP	VIP
luteolin	VEGFA
tanshinone i	VEGFA
quercetin	VEGFA
daidzein	VEGFA
apigenin	VEGFA
atractylenolide i	VEGFA
diosgenin	VEGFA
α-Amyrin	VDR
beta-Eudesmol	VDR
(3S,8S,9S,10R,13R,14S,17R)-10,13-dimethyl-17-[(2R,5S)-5-propan-2-yloctan-2-yl]-2,3,4,7,8,9,11,12,14,15,16,17-dodecahydro-1H-cyclopenta[a]phenanthren-3-ol	VDR
Hinesol	VDR
EIC	VDR
Poriferasterol	VDR
poriferast-5-en-3beta-ol	VDR
sugiol	VDR
α-amyrin	VDR
sclareol	VDR
manool	VDR
NSC 122421	VDR
Salvinone	VDR
gamma-sitosterol	VDR
Stigmasterol	VDR
poriferasta-7,22E-dien-3beta-ol	VDR
ZINC03978781	VDR
Spinasterol	VDR
Taraxerol	VDR
(2R)-2-[(3S,5R,10S,13R,14R,16R,17R)-3,16-dihydroxy-4,4,10,13,14-pentamethyl-2,3,5,6,12,15,16,17-octahydro-1H-cyclopenta[a]phenanthren-17-yl]-6-methylhept-5-enoic acid	VDR
3β-hydroxylanosta-7,9(11),24-trien-21-oic acid	VDR
Cerevisterol	VDR
(2R)-2-[(3S,5R,10S,13R,14R,16R,17R)-3,16-dihydroxy-4,4,10,13,14-pentamethyl-2,3,5,6,12,15,16,17-octahydro-1H-cyclopenta[a]phenanthren-17-yl]-5-isopropyl-hex-5-enoic acid	VDR
ergosta-7,22E-dien-3beta-ol	VDR
(2R)-2-[(5R,10S,13R,14R,16R,17R)-16-hydroxy-3-keto-4,4,10,13,14-pentamethyl-1,2,5,6,12,15,16,17-octahydrocyclopenta[a]phenanthren-17-yl]-5-isopropyl-hex-5-enoic acid	VDR
poricoic acid C	VDR
ergosterol	VDR
dehydroeburicoic acid	VDR
2-lauroleic acid	VDR
lupeol	VDR
LUPENONE	VDR
γ-sitosterol	VDR
campesterol	VDR
Isofucosterol	VDR
CLR	VDR
beta-sitosterol	VDR
NSC63551	VDR
(R)-linalool	VDR
Amyrin	VDR
campest-5-en-3beta-ol	VDR
Quercetin-3-O-Galactoside-7-O-Glucoside	VDR
Sitosterol alpha1	VDR
isoarborinol	VDR
sitosterol	VDR
Gulutamine	VDAC3
gamma-aminobutyric acid	VDAC3
betaine	VDAC3
L-Lysin	VDAC3
Gulutamine	VDAC2
gamma-aminobutyric acid	VDAC2
betaine	VDAC2
L-Lysin	VDAC2
Gulutamine	VDAC1
gamma-aminobutyric acid	VDAC1
betaine	VDAC1
L-Lysin	VDAC1
gamma-aminobutyric acid	VCP
(+/-)-Isoborneol	VCP
Flavaxin	VCP
LUPENONE	VCP
cholestanol	VCP
NSC63551	VCP
()-Borneol	VCP
kaempferol	VCAM1
tanshinone i	VCAM1
quercetin	VCAM1
daidzein	VCAM1
alpha-Curcumene	VCAM1
(+)-alpha-Curcumene	VCAM1
Nonanol	VCAM1
LDP	VCAM1
Gulutamine	VARS2
L-Lysin	VARS2
Gulutamine	VARS
gamma-aminobutyric acid	VARS
L-Lysin	VARS
Prolinum	VAPB
Prolinum	VAPA
dan-shexinkum b	VANGL2
dan-shexinkum c	VANGL2
deoxyneocryptotanshinone	VANGL2
miltionone Ⅰ	VANGL2
Tanshiquinone B	VANGL2
alpha-Curcumene	UTS2R
2-isopropyl-8-methylphenanthrene-3,4-dione	UTS2R
Miltirone	UTS2R
(+)-alpha-Curcumene	UTS2R
Nonanol	UTS2R
gamma-aminobutyric acid	UTS2R
LUPENONE	UTS2R
(S)-Allantoin	UTS2R
NSC63551	UTS2R
alpha-Curcumene	UTS2
2-isopropyl-8-methylphenanthrene-3,4-dione	UTS2
Miltirone	UTS2
(+)-alpha-Curcumene	UTS2
Nonanol	UTS2
gamma-aminobutyric acid	UTS2
LUPENONE	UTS2
(S)-Allantoin	UTS2
NSC63551	UTS2
Gulutamine	UROS
Azelex	UROS
myristic acid	UROS
Undekansaeure	UROS
caprylic acid	UROS
lauric acid	UROS
palmitic acid	UROS
Docosanoate	UROS
L-Lysin	UROS
hexanoic acid	UROS
Gulutamine	UROD
dan-shexinkum b	UROD
dan-shexinkum c	UROD
deoxyneocryptotanshinone	UROD
miltionone Ⅰ	UROD
Tanshiquinone B	UROD
Azelex	UROD
myristic acid	UROD
Undekansaeure	UROD
caprylic acid	UROD
lauric acid	UROD
palmitic acid	UROD
gamma-aminobutyric acid	UROD
Docosanoate	UROD
(S)-Allantoin	UROD
L-Lysin	UROD
hexanoic acid	UROD
Istidina	UROC1
FA	UROC1
alpha-Curcumene	UNC93B1
(+)-alpha-Curcumene	UNC93B1
Gulutamine	UMPS
L-Lysin	UMPS
alpha-Curcumene	UGT8
(+)-alpha-Curcumene	UGT8
Azelex	UGT8
myristic acid	UGT8
Undekansaeure	UGT8
caprylic acid	UGT8
lauric acid	UGT8
palmitic acid	UGT8
Docosanoate	UGT8
hexanoic acid	UGT8
2-isopropyl-8-methylphenanthrene-3,4-dione	UGT3A2
dan-shexinkum b	UGT3A2
dan-shexinkum c	UGT3A2
deoxyneocryptotanshinone	UGT3A2
miltionone Ⅰ	UGT3A2
Miltirone	UGT3A2
Tanshiquinone B	UGT3A2
kaempferol	UGT3A1
quercetin	UGT3A1
sesamin	UGT1A1
dan-shexinkum b	UGT1A1
dan-shexinkum c	UGT1A1
deoxyneocryptotanshinone	UGT1A1
miltionone Ⅰ	UGT1A1
Tanshiquinone B	UGT1A1
Azelex	UGT1A1
myristic acid	UGT1A1
Undekansaeure	UGT1A1
caprylic acid	UGT1A1
lauric acid	UGT1A1
palmitic acid	UGT1A1
Docosanoate	UGT1A1
hexanoic acid	UGT1A1
alpha-Curcumene	UGCG
(+)-alpha-Curcumene	UGCG
(+/-)-Isoborneol	UCN2
LUPENONE	UCN2
cholestanol	UCN2
NSC63551	UCN2
()-Borneol	UCN2
LDP	UCN
alpha-Curcumene	UCHL1
(+)-alpha-Curcumene	UCHL1
beta-Eudesmol	UBR5
Hinesol	UBR5
sclareol	UBR5
manool	UBR5
LUPENONE	UBR5
NSC63551	UBR5
(R)-linalool	UBR5
2-isopropyl-8-methylphenanthrene-3,4-dione	UBIAD1
Miltirone	UBIAD1
Azelex	UBE2B
myristic acid	UBE2B
Undekansaeure	UBE2B
caprylic acid	UBE2B
lauric acid	UBE2B
palmitic acid	UBE2B
Docosanoate	UBE2B
LUPENONE	UBE2B
NSC63551	UBE2B
hexanoic acid	UBE2B
Gulutamine	TYW5
L-Lysin	TYW5
vanillic acid	TYRP1
Azelex	TYRP1
myristic acid	TYRP1
Undekansaeure	TYRP1
caprylic acid	TYRP1
lauric acid	TYRP1
palmitic acid	TYRP1
Docosanoate	TYRP1
Batatasin I	TYRP1
Batatasin IV	TYRP1
Batatasin Iii	TYRP1
hexanoic acid	TYRP1
luteolin	TYR
Azelex	TYR
Methyl myristate	TYR
myristic acid	TYR
Dodecanal	TYR
Nonanol	TYR
Undekansaeure	TYR
caprylic acid	TYR
lauric acid	TYR
palmitic acid	TYR
Mairin	TYR
(6aR,11aR)-9,10-dimethoxy-6a,11a-dihydro-6H-benzofurano[3,2-c]chromen-3-ol	TYR
Docosanoate	TYR
Mucronulatol	TYR
(3R)-3-(2-hydroxy-3,4-dimethoxyphenyl)chroman-7-ol	TYR
1,7-Dihydroxy-3,9-dimethoxy pterocarpene	TYR
Batatasin I	TYR
Batatasin IV	TYR
L-Lysin	TYR
Batatasin Iii	TYR
MBOA	TYR
hexanoic acid	TYR
Coixan A	TYR
Gulutamine	TYMS
L-uridine	TYMS
FA	TYMS
L-Lysin	TYMS
Coixan A	TYMS
alpha-Curcumene	TYMP
(+)-alpha-Curcumene	TYMP
L-uridine	TXNRD1
choline	TXNRD1
Flavaxin	TXNRD1
FA	TXNRD1
Prolinum	TWIST1
7-(beta-Xylosyl)cephalomannine_qt	TUBB1
Omaine	TUBB1
sesamin	TUBB
Omaine	TUBB
sesamin	TUBA4A
(6aR,11aR)-9,10-dimethoxy-6a,11a-dihydro-6H-benzofurano[3,2-c]chromen-3-ol	TTPA
Mucronulatol	TTPA
(3R)-3-(2-hydroxy-3,4-dimethoxyphenyl)chroman-7-ol	TTPA
1,7-Dihydroxy-3,9-dimethoxy pterocarpene	TTPA
MBOA	TTPA
Azelex	TST
myristic acid	TST
Undekansaeure	TST
caprylic acid	TST
lauric acid	TST
palmitic acid	TST
Docosanoate	TST
hexanoic acid	TST
EIC	TSPO
Norharman	TSPO
poricoic acid C	TSPO
2-lauroleic acid	TSPO
Astragalus polysaccharide	TSPO
LDP	TSPO
(+/-)-Isoborneol	TRPV3
beta-Eudesmol	TRPV3
sclareol	TRPV3
manool	TRPV3
Nonanol	TRPV3
lupeol	TRPV3
cholestanol	TRPV3
()-Borneol	TRPV3
EIC	TRPV1
(+/-)-Isoborneol	TRPV1
alpha-Curcumene	TRPV1
(+)-alpha-Curcumene	TRPV1
myristic acid	TRPV1
METHYL LINOLEATE	TRPV1
methyl icosa-11,14-dienoate	TRPV1
3β-hydroxylanosta-7,9(11),24-trien-21-oic acid	TRPV1
trametenolic acid	TRPV1
tumulosic acid	TRPV1
3beta-Hydroxy-24-methylene-8-lanostene-21-oic acid	TRPV1
poricoic acid C	TRPV1
hederagenin	TRPV1
Tumulosic acid	TRPV1
dehydroeburicoic acid	TRPV1
2-lauroleic acid	TRPV1
lauric acid	TRPV1
Mairin	TRPV1
cholestanol	TRPV1
NSC63551	TRPV1
()-Borneol	TRPV1
Mandenol	TRPV1
2-Monoolein	TRPV1
(+/-)-Isoborneol	TRPM8
alpha-Curcumene	TRPM8
beta-Eudesmol	TRPM8
EIC	TRPM8
sclareol	TRPM8
manool	TRPM8
(+)-alpha-Curcumene	TRPM8
Nonanol	TRPM8
poricoic acid C	TRPM8
2-lauroleic acid	TRPM8
lupeol	TRPM8
cholestanol	TRPM8
()-Borneol	TRPM8
daidzein	TRPM2
apigenin	TRPM2
Gulutamine	TRPM1
L-Lysin	TRPM1
(+/-)-Isoborneol	TRPA1
alpha-Curcumene	TRPA1
beta-Eudesmol	TRPA1
EIC	TRPA1
sclareol	TRPA1
manool	TRPA1
(+)-alpha-Curcumene	TRPA1
Nonanol	TRPA1
poricoic acid C	TRPA1
2-lauroleic acid	TRPA1
lupeol	TRPA1
cholestanol	TRPA1
()-Borneol	TRPA1
LUPENONE	TRIM28
NSC63551	TRIM28
α-Amyrin	TRIM24
beta-Eudesmol	TRIM24
(3S,8S,9S,10R,13R,14S,17R)-10,13-dimethyl-17-[(2R,5S)-5-propan-2-yloctan-2-yl]-2,3,4,7,8,9,11,12,14,15,16,17-dodecahydro-1H-cyclopenta[a]phenanthren-3-ol	TRIM24
Hinesol	TRIM24
Poriferasterol	TRIM24
poriferast-5-en-3beta-ol	TRIM24
sugiol	TRIM24
α-amyrin	TRIM24
sclareol	TRIM24
manool	TRIM24
NSC 122421	TRIM24
Salvinone	TRIM24
gamma-sitosterol	TRIM24
Stigmasterol	TRIM24
poriferasta-7,22E-dien-3beta-ol	TRIM24
ZINC03978781	TRIM24
Spinasterol	TRIM24
Taraxerol	TRIM24
ergosta-7,22E-dien-3beta-ol	TRIM24
ergosterol	TRIM24
lupeol	TRIM24
LUPENONE	TRIM24
γ-sitosterol	TRIM24
Isofucosterol	TRIM24
CLR	TRIM24
beta-sitosterol	TRIM24
NSC63551	TRIM24
(R)-linalool	TRIM24
Amyrin	TRIM24
campest-5-en-3beta-ol	TRIM24
Quercetin-3-O-Galactoside-7-O-Glucoside	TRIM24
Sitosterol alpha1	TRIM24
isoarborinol	TRIM24
sitosterol	TRIM24
campesterol	TRIM24
Istidina	TRH
LUPENONE	TREM1
NSC63551	TREM1
myristic acid	TRAPPC3
palmitic acid	TRAPPC3
D-Camphene	TPO
Hemo-sol	TPO
alpha-humulene	TPO
beta-Humulene	TPO
beta-Selinene	TPO
beta-caryophyllene	TPO
γ-elemene	TPO
alloaromadedrene	TPO
Squalene	TPO
beta-Chamigrene	TPO
(-)-alpha-Pinene	TPO
()-beta-Pinene	TPO
beta-Curcumene	TPO
bulnesene	TPO
Stigmasterol	TPO
(6Z,10E,14E,18E)-2,6,10,15,19,23-hexamethyltetracosa-2,6,10,14,18,22-hexaene	TPO
cis-p-Coumarate	TPMT
Caffeate	TPMT
alpha-Curcumene	TPM1
(+)-alpha-Curcumene	TPM1
LUPENONE	TPM1
NSC63551	TPM1
Coixan A	TPM1
Perlolyrine	TPK1
betaine	TPI1
Gulutamine	TPI1
6-methylolpyridin-3-ol	TPI1
LDP	TPH2
LDP	TPH1
dan-shexinkum b	TP63
dan-shexinkum c	TP63
deoxyneocryptotanshinone	TP63
miltionone Ⅰ	TP63
Tanshiquinone B	TP63
tanshinone iia	TP53
quercetin	TP53
luteolin	TP53
diosgenin	TP53
apigenin	TP53
daidzein	TP53
7,9(11)-dehydropachymic acid	TP53
pachymic acid	TP53
LUPENONE	TP53
NSC63551	TP53
Coixan A	TP53
beta-Eudesmol	TOX3
Hinesol	TOX3
sugiol	TOX3
sclareol	TOX3
manool	TOX3
NSC 122421	TOX3
Salvinone	TOX3
LUPENONE	TOX3
NSC63551	TOX3
(R)-linalool	TOX3
Coixan A	TOP3B
Coixan A	TOP3A
Coixan A	TOP2B
luteolin	TOP2A
quercetin	TOP2A
Bifendate	TOP2A
isomucronulatol-7,2'-di-O-glucosiole	TOP2A
neocryptotanshinone	TOP2A
1,2,5,6-tetrahydrotanshinone	TOP2A
isocryptotanshi-none	TOP2A
Miltirone	TOP2A
deoxyneocryptotanshinone	TOP2A
(R)-linalool	TOP2A
miltionone Ⅰ	TOP2A
Hyperin	TOP2A
Kadsurenone	TOP2A
kaempferol	TOP2A
Hirsutrin	TOP2A
D-Camphene	TOP2A
Omaine	TOP2A
dan-shexinkum d	TOP2A
apigenin	TOP2A
(+)-Syringaresinol	TOP2A
alexandrin	TOP2A
Astragalin	TOP2A
Danshenol B	TOP2A
rutin	TOP2A
kaempferol-3-o-beta-d-glucoside	TOP2A
4-methylenemiltirone	TOP2A
5,6-dihydroxy-7-isopropyl-1,1-dimethyl-2,3-dihydrophenanthren-4-one	TOP2A
hancinone C	TOP2A
cryptotanshinone	TOP2A
Astraisoflavanin	TOP2A
AIDS180907	TOP2A
Akridin	TOP2A
sesamin	TOP2A
Coixan A	TOP2A
Coixan A	TOP1MT
luteolin	TOP1
quercetin	TOP1
Azelex	TOP1
myristic acid	TOP1
Undekansaeure	TOP1
caprylic acid	TOP1
lauric acid	TOP1
palmitic acid	TOP1
Docosanoate	TOP1
hexanoic acid	TOP1
Coixan A	TOP1
Gulutamine	TOMM40L
L-Lysin	TOMM40L
Gulutamine	TOMM40
L-Lysin	TOMM40
Nonanol	TNR
Gulutamine	TNNT3
L-Lysin	TNNT3
Gulutamine	TNNT2
L-Lysin	TNNT2
Gulutamine	TNNT1
L-Lysin	TNNT1
Gulutamine	TNNI3K
L-Lysin	TNNI3K
Gulutamine	TNNI3
L-Lysin	TNNI3
Gulutamine	TNNI2
L-Lysin	TNNI2
alpha-Curcumene	TNNC1
Gulutamine	TNNC1
(+)-alpha-Curcumene	TNNC1
gamma-aminobutyric acid	TNNC1
betaine	TNNC1
L-Lysin	TNNC1
poriferast-5-en-3beta-ol	TNK2
Stigmasterol	TNK2
beta-sitosterol	TNK2
campest-5-en-3beta-ol	TNK2
Quercetin-3-O-Galactoside-7-O-Glucoside	TNK2
campesterol	TNK2
beta-Eudesmol	TNFSF11
Hinesol	TNFSF11
sclareol	TNFSF11
dan-shexinkum b	TNFSF11
dan-shexinkum c	TNFSF11
deoxyneocryptotanshinone	TNFSF11
manool	TNFSF11
miltionone Ⅰ	TNFSF11
Tanshiquinone B	TNFSF11
LUPENONE	TNFSF11
NSC63551	TNFSF11
(R)-linalool	TNFSF11
dan-shexinkum b	TNFRSF11A
dan-shexinkum c	TNFRSF11A
deoxyneocryptotanshinone	TNFRSF11A
miltionone Ⅰ	TNFRSF11A
Tanshiquinone B	TNFRSF11A
dan-shexinkum b	TNFAIP3
dan-shexinkum c	TNFAIP3
deoxyneocryptotanshinone	TNFAIP3
miltionone Ⅰ	TNFAIP3
Tanshiquinone B	TNFAIP3
LUPENONE	TNFAIP3
NSC63551	TNFAIP3
cryptotanshinone	TNF
apigenin	TNF
luteolin	TNF
atractylenolide iii	TNF
alpha-humulene	TNF
kaempferol	TNF
quercetin	TNF
matrine	TNF
rutin	TNF
daidzein	TNF
atractylenolide i	TNF
EIC	TNF
dan-shexinkum b	TNF
dan-shexinkum c	TNF
deoxyneocryptotanshinone	TNF
C09092	TNF
miltionone Ⅰ	TNF
Tanshiquinone B	TNF
Beta-Glucan	TNF
poricoic acid C	TNF
2-lauroleic acid	TNF
Ethyl glucoside	TNF
cis-p-Coumarate	TNF
LUPENONE	TNF
Sucrose	TNF
LDP	TNF
(S)-Allantoin	TNF
NSC63551	TNF
Astragalus polysaccharide	TNC
Gulutamine	TMLHE
Azelex	TMLHE
myristic acid	TMLHE
Undekansaeure	TMLHE
caprylic acid	TMLHE
lauric acid	TMLHE
palmitic acid	TMLHE
Docosanoate	TMLHE
FA	TMLHE
L-Lysin	TMLHE
hexanoic acid	TMLHE
Gulutamine	TMEM110
Azelex	TMEM110
myristic acid	TMEM110
Undekansaeure	TMEM110
caprylic acid	TMEM110
lauric acid	TMEM110
palmitic acid	TMEM110
Docosanoate	TMEM110
L-Lysin	TMEM110
hexanoic acid	TMEM110
2-isopropyl-8-methylphenanthrene-3,4-dione	TMBIM6
Miltirone	TMBIM6
alpha-Curcumene	TLR9
(+)-alpha-Curcumene	TLR9
alpha-Curcumene	TLR8
(+)-alpha-Curcumene	TLR8
alpha-Curcumene	TLR7
(+)-alpha-Curcumene	TLR7
Gulutamine	TLR4
myristic acid	TLR4
LDP	TLR4
L-Lysin	TLR4
alpha-Curcumene	TLR3
dan-shexinkum b	TLR3
dan-shexinkum c	TLR3
deoxyneocryptotanshinone	TLR3
C09092	TLR3
miltionone Ⅰ	TLR3
Tanshiquinone B	TLR3
(+)-alpha-Curcumene	TLR3
6-methylolpyridin-3-ol	TKT
LUPENONE	TKT
NSC63551	TKT
Gulutamine	TK1
L-Lysin	TK1
dan-shexinkum b	TIRAP
dan-shexinkum c	TIRAP
deoxyneocryptotanshinone	TIRAP
C09092	TIRAP
miltionone Ⅰ	TIRAP
Tanshiquinone B	TIRAP
danshensu	TIMP1
7,9(11)-dehydropachymic acid	TIGAR
pachymic acid	TIGAR
cis-p-Coumarate	TIGAR
cis-p-Coumarate	TICAM2
2-isopropyl-8-methylphenanthrene-3,4-dione	THRB
Miltirone	THRB
CLR	THRB
CLR	THRA
Gulutamine	THNSL2
FA	THNSL2
L-Lysin	THNSL2
Gulutamine	THNSL1
gamma-aminobutyric acid	THNSL1
L-Lysin	THNSL1
quercetin	THBD
Gulutamine	TH
Istidina	TH
dan-shexinkum b	TH
dan-shexinkum c	TH
deoxyneocryptotanshinone	TH
miltionone Ⅰ	TH
danshensu	TH
Tanshiquinone B	TH
Azelex	TH
myristic acid	TH
Undekansaeure	TH
caprylic acid	TH
lauric acid	TH
palmitic acid	TH
gamma-aminobutyric acid	TH
Docosanoate	TH
LDP	TH
(S)-Allantoin	TH
L-Lysin	TH
hexanoic acid	TH
dan-shexinkum b	TGFB2
dan-shexinkum c	TGFB2
deoxyneocryptotanshinone	TGFB2
C09092	TGFB2
miltionone Ⅰ	TGFB2
Tanshiquinone B	TGFB2
daidzein	TGFB1I1
quercetin	TGFB1
danshensu	TGFB1
beta-sitosterol	TGFB1
beta-Eudesmol	TGFB1
Hinesol	TGFB1
sugiol	TGFB1
sclareol	TGFB1
manool	TGFB1
NSC 122421	TGFB1
Salvinone	TGFB1
LUPENONE	TGFB1
NSC63551	TGFB1
(R)-linalool	TGFB1
2-isopropyl-8-methylphenanthrene-3,4-dione	TFPI
Miltirone	TFPI
daidzein	TFF1
beta-Eudesmol	TFAP2C
Hinesol	TFAP2C
sugiol	TFAP2C
sclareol	TFAP2C
manool	TFAP2C
NSC 122421	TFAP2C
Salvinone	TFAP2C
LUPENONE	TFAP2C
NSC63551	TFAP2C
(R)-linalool	TFAP2C
Gulutamine	TFAP2B
L-Lysin	TFAP2B
LUPENONE	TET1
NSC63551	TET1
LDP	TESC
L-uridine	TERT
Gulutamine	TDO2
L-Lysin	TDO2
Coixan A	TCOF1
FA	TCN1
α-Amyrin	TCF3
(3S,8S,9S,10R,13R,14S,17R)-10,13-dimethyl-17-[(2R,5S)-5-propan-2-yloctan-2-yl]-2,3,4,7,8,9,11,12,14,15,16,17-dodecahydro-1H-cyclopenta[a]phenanthren-3-ol	TCF3
EIC	TCF3
Poriferasterol	TCF3
poriferast-5-en-3beta-ol	TCF3
α-amyrin	TCF3
gamma-sitosterol	TCF3
Stigmasterol	TCF3
poriferasta-7,22E-dien-3beta-ol	TCF3
ZINC03978781	TCF3
Spinasterol	TCF3
Taraxerol	TCF3
ergosta-7,22E-dien-3beta-ol	TCF3
poricoic acid C	TCF3
ergosterol	TCF3
2-lauroleic acid	TCF3
lupeol	TCF3
LUPENONE	TCF3
γ-sitosterol	TCF3
Isofucosterol	TCF3
CLR	TCF3
beta-sitosterol	TCF3
NSC63551	TCF3
Amyrin	TCF3
campest-5-en-3beta-ol	TCF3
Quercetin-3-O-Galactoside-7-O-Glucoside	TCF3
Sitosterol alpha1	TCF3
isoarborinol	TCF3
sitosterol	TCF3
campesterol	TCF3
cis-p-Coumarate	TBXAS1
rutin	TBXA2R
cis-p-Coumarate	TBX21
dan-shexinkum b	TBR1
dan-shexinkum c	TBR1
deoxyneocryptotanshinone	TBR1
miltionone Ⅰ	TBR1
Tanshiquinone B	TBR1
Nonanol	TBR1
gamma-aminobutyric acid	TBR1
LDP	TBR1
(S)-Allantoin	TBR1
Gulutamine	TBPL1
FA	TBPL1
L-Lysin	TBPL1
EIC	TBC1D32
poricoic acid C	TBC1D32
2-lauroleic acid	TBC1D32
Prolinum	TBC1D20
Gulutamine	TAT
Istidina	TAT
danshensu	TAT
LDP	TAT
L-Lysin	TAT
LUPENONE	TAS1R3
NSC63551	TAS1R3
LUPENONE	TAS1R2
NSC63551	TAS1R2
LUPENONE	TAS1R1
NSC63551	TAS1R1
Gulutamine	TARS2
gamma-aminobutyric acid	TARS2
L-Lysin	TARS2
Gulutamine	TARS
gamma-aminobutyric acid	TARS
LUPENONE	TALDO1
NSC63551	TALDO1
LUPENONE	TAL1
NSC63551	TAL1
Gulutamine	TAF7
L-Lysin	TAF7
(+/-)-Isoborneol	TACR2
Nonanol	TACR2
gamma-aminobutyric acid	TACR2
LUPENONE	TACR2
LDP	TACR2
cholestanol	TACR2
(S)-Allantoin	TACR2
NSC63551	TACR2
()-Borneol	TACR2
tanshinone Ⅵ	TACR1
LDP	TACR1
(+/-)-Isoborneol	TAC4
LUPENONE	TAC4
cholestanol	TAC4
NSC63551	TAC4
()-Borneol	TAC4
(+/-)-Isoborneol	TAC1
LUPENONE	TAC1
cholestanol	TAC1
NSC63551	TAC1
()-Borneol	TAC1
LDP	TAAR1
LUPENONE	SYT2
LDP	SYT2
NSC63551	SYT2
LDP	SYT1
Prolinum	SYNCRIP
alpha-Curcumene	SYK
Istidina	SYK
(+)-alpha-Curcumene	SYK
FA	SUPV3L1
Azelex	SUOX
myristic acid	SUOX
Undekansaeure	SUOX
caprylic acid	SUOX
lauric acid	SUOX
palmitic acid	SUOX
Docosanoate	SUOX
hexanoic acid	SUOX
Coixan A	SUMO4
Nonanol	SUMO1
Coixan A	SUMO1
Azelex	SULT2A1
myristic acid	SULT2A1
Undekansaeure	SULT2A1
caprylic acid	SULT2A1
lauric acid	SULT2A1
palmitic acid	SULT2A1
Docosanoate	SULT2A1
hexanoic acid	SULT2A1
quercetin	SULT1E1
Azelex	SUGCT
myristic acid	SUGCT
Undekansaeure	SUGCT
caprylic acid	SUGCT
lauric acid	SUGCT
palmitic acid	SUGCT
Docosanoate	SUGCT
hexanoic acid	SUGCT
Azelex	SUCNR1
myristic acid	SUCNR1
Undekansaeure	SUCNR1
caprylic acid	SUCNR1
lauric acid	SUCNR1
palmitic acid	SUCNR1
Docosanoate	SUCNR1
hexanoic acid	SUCNR1
Azelex	SUCLG2
myristic acid	SUCLG2
Undekansaeure	SUCLG2
caprylic acid	SUCLG2
lauric acid	SUCLG2
palmitic acid	SUCLG2
Docosanoate	SUCLG2
hexanoic acid	SUCLG2
Azelex	SUCLG1
myristic acid	SUCLG1
Undekansaeure	SUCLG1
caprylic acid	SUCLG1
lauric acid	SUCLG1
palmitic acid	SUCLG1
Docosanoate	SUCLG1
hexanoic acid	SUCLG1
Azelex	SUCLA2
myristic acid	SUCLA2
Undekansaeure	SUCLA2
caprylic acid	SUCLA2
lauric acid	SUCLA2
palmitic acid	SUCLA2
Docosanoate	SUCLA2
hexanoic acid	SUCLA2
EIC	STX3
poricoic acid C	STX3
2-lauroleic acid	STX3
D-Camphene	STX1A
Hemo-sol	STX1A
alpha-humulene	STX1A
beta-Humulene	STX1A
beta-Selinene	STX1A
beta-caryophyllene	STX1A
γ-elemene	STX1A
alloaromadedrene	STX1A
Squalene	STX1A
beta-Chamigrene	STX1A
(-)-alpha-Pinene	STX1A
()-beta-Pinene	STX1A
beta-Curcumene	STX1A
bulnesene	STX1A
Stigmasterol	STX1A
(6Z,10E,14E,18E)-2,6,10,15,19,23-hexamethyltetracosa-2,6,10,14,18,22-hexaene	STX1A
LUPENONE	STUB1
NSC63551	STUB1
Prolinum	STOM
quercetin	STK17B
Gulutamine	STIM2
Azelex	STIM2
myristic acid	STIM2
Undekansaeure	STIM2
caprylic acid	STIM2
lauric acid	STIM2
palmitic acid	STIM2
Docosanoate	STIM2
L-Lysin	STIM2
hexanoic acid	STIM2
Gulutamine	STIM1
Azelex	STIM1
myristic acid	STIM1
Undekansaeure	STIM1
caprylic acid	STIM1
lauric acid	STIM1
palmitic acid	STIM1
Docosanoate	STIM1
L-Lysin	STIM1
hexanoic acid	STIM1
2-isopropyl-8-methylphenanthrene-3,4-dione	STATH
Miltirone	STATH
Gulutamine	STAT5B
L-Lysin	STAT5B
Gulutamine	STAT5A
LUPENONE	STAT5A
L-Lysin	STAT5A
NSC63551	STAT5A
cryptotanshinone	STAT3
kaempferol	STAT1
quercetin	STAT1
daidzein	STAT1
Gulutamine	STAR
dan-shexinkum b	STAR
dan-shexinkum c	STAR
deoxyneocryptotanshinone	STAR
miltionone Ⅰ	STAR
Tanshiquinone B	STAR
Azelex	STAR
myristic acid	STAR
Undekansaeure	STAR
caprylic acid	STAR
lauric acid	STAR
palmitic acid	STAR
gamma-aminobutyric acid	STAR
Docosanoate	STAR
(S)-Allantoin	STAR
L-Lysin	STAR
hexanoic acid	STAR
dan-shexinkum b	STAP1
dan-shexinkum c	STAP1
deoxyneocryptotanshinone	STAP1
miltionone Ⅰ	STAP1
Tanshiquinone B	STAP1
LUPENONE	STAP1
NSC63551	STAP1
tanshinone Ⅵ	SSTR5
tanshinone Ⅵ	SSTR2
Coixan A	SSRP1
dan-shexinkum b	SRSF6
dan-shexinkum c	SRSF6
deoxyneocryptotanshinone	SRSF6
miltionone Ⅰ	SRSF6
Tanshiquinone B	SRSF6
Coixan A	SRSF2
Coixan A	SRSF1
Coixan A	SRRM1
Gulutamine	SRR
Istidina	SRR
choline	SRR
FA	SRR
L-Lysin	SRR
alpha-Curcumene	SRPK2
(+)-alpha-Curcumene	SRPK2
Coixan A	SRPK1
LDP	SRI
sesamin	SREBF1
alpha-Curcumene	SREBF1
(+)-alpha-Curcumene	SREBF1
(6aR,11aR)-9,10-dimethoxy-6a,11a-dihydro-6H-benzofurano[3,2-c]chromen-3-ol	SREBF1
Mucronulatol	SREBF1
(3R)-3-(2-hydroxy-3,4-dimethoxyphenyl)chroman-7-ol	SREBF1
LUPENONE	SREBF1
1,7-Dihydroxy-3,9-dimethoxy pterocarpene	SREBF1
NSC63551	SREBF1
MBOA	SREBF1
Coixan A	SREBF1
Azelex	SRD5A3
myristic acid	SRD5A3
Undekansaeure	SRD5A3
caprylic acid	SRD5A3
lauric acid	SRD5A3
palmitic acid	SRD5A3
Docosanoate	SRD5A3
hexanoic acid	SRD5A3
dan-shexinkum b	SRD5A2
dan-shexinkum c	SRD5A2
deoxyneocryptotanshinone	SRD5A2
miltionone Ⅰ	SRD5A2
Tanshiquinone B	SRD5A2
Azelex	SRD5A2
Methyl myristate	SRD5A2
myristic acid	SRD5A2
Dodecanal	SRD5A2
Nonanol	SRD5A2
Undekansaeure	SRD5A2
caprylic acid	SRD5A2
lauric acid	SRD5A2
palmitic acid	SRD5A2
Mairin	SRD5A2
Docosanoate	SRD5A2
L-Lysin	SRD5A2
hexanoic acid	SRD5A2
α-Amyrin	SRD5A1
Hinesol	SRD5A1
α-amyrin	SRD5A1
poriferasta-7,22E-dien-3beta-ol	SRD5A1
Azelex	SRD5A1
myristic acid	SRD5A1
Spinasterol	SRD5A1
Taraxerol	SRD5A1
(2R)-2-[(3S,5R,10S,13R,14R,16R,17R)-3,16-dihydroxy-4,4,10,13,14-pentamethyl-2,3,5,6,12,15,16,17-octahydro-1H-cyclopenta[a]phenanthren-17-yl]-6-methylhept-5-enoic acid	SRD5A1
3β-hydroxylanosta-7,9(11),24-trien-21-oic acid	SRD5A1
trametenolic acid	SRD5A1
tumulosic acid	SRD5A1
(2R)-2-[(3S,5R,10S,13R,14R,16R,17R)-3,16-dihydroxy-4,4,10,13,14-pentamethyl-2,3,5,6,12,15,16,17-octahydro-1H-cyclopenta[a]phenanthren-17-yl]-5-isopropyl-hex-5-enoic acid	SRD5A1
ergosta-7,22E-dien-3beta-ol	SRD5A1
(2R)-2-[(5R,10S,13R,14R,16R,17R)-16-hydroxy-3-keto-4,4,10,13,14-pentamethyl-1,2,5,6,12,15,16,17-octahydrocyclopenta[a]phenanthren-17-yl]-5-isopropyl-hex-5-enoic acid	SRD5A1
3beta-Hydroxy-24-methylene-8-lanostene-21-oic acid	SRD5A1
poricoic acid C	SRD5A1
hederagenin	SRD5A1
Tumulosic acid	SRD5A1
dehydroeburicoic acid	SRD5A1
Undekansaeure	SRD5A1
caprylic acid	SRD5A1
lauric acid	SRD5A1
palmitic acid	SRD5A1
Docosanoate	SRD5A1
Amyrin	SRD5A1
Sitosterol alpha1	SRD5A1
isoarborinol	SRD5A1
hexanoic acid	SRD5A1
beta-Eudesmol	SRC
Hinesol	SRC
sclareol	SRC
dan-shexinkum b	SRC
dan-shexinkum c	SRC
deoxyneocryptotanshinone	SRC
manool	SRC
miltionone Ⅰ	SRC
Tanshiquinone B	SRC
LUPENONE	SRC
NSC63551	SRC
(R)-linalool	SRC
Azelex	SQRDL
myristic acid	SQRDL
Undekansaeure	SQRDL
caprylic acid	SQRDL
lauric acid	SQRDL
palmitic acid	SQRDL
Docosanoate	SQRDL
hexanoic acid	SQRDL
2-isopropyl-8-methylphenanthrene-3,4-dione	SPX
Miltirone	SPX
gamma-aminobutyric acid	SPX
LUPENONE	SPX
(S)-Allantoin	SPX
NSC63551	SPX
choline	SPTLC2
choline	SPTLC1
2-isopropyl-8-methylphenanthrene-3,4-dione	SPRY2
Miltirone	SPRY2
2-isopropyl-8-methylphenanthrene-3,4-dione	SPRY1
Miltirone	SPRY1
LUPENONE	SPR
NSC63551	SPR
quercetin	SPP1
alpha-Curcumene	SPIDR
(+)-alpha-Curcumene	SPIDR
Azelex	SPI1
myristic acid	SPI1
Undekansaeure	SPI1
caprylic acid	SPI1
lauric acid	SPI1
palmitic acid	SPI1
Docosanoate	SPI1
LUPENONE	SPI1
NSC63551	SPI1
hexanoic acid	SPI1
D-Camphene	SPARC
Hemo-sol	SPARC
alpha-humulene	SPARC
beta-Humulene	SPARC
beta-Selinene	SPARC
beta-caryophyllene	SPARC
γ-elemene	SPARC
alloaromadedrene	SPARC
Squalene	SPARC
beta-Chamigrene	SPARC
dan-shexinkum b	SPARC
dan-shexinkum c	SPARC
deoxyneocryptotanshinone	SPARC
miltionone Ⅰ	SPARC
Tanshiquinone B	SPARC
(-)-alpha-Pinene	SPARC
()-beta-Pinene	SPARC
beta-Curcumene	SPARC
bulnesene	SPARC
Stigmasterol	SPARC
(6Z,10E,14E,18E)-2,6,10,15,19,23-hexamethyltetracosa-2,6,10,14,18,22-hexaene	SPARC
EIC	SP3
poricoic acid C	SP3
2-lauroleic acid	SP3
EIC	SP1
poricoic acid C	SP1
2-lauroleic acid	SP1
beta-Eudesmol	SOX9
Hinesol	SOX9
EIC	SOX9
sugiol	SOX9
sclareol	SOX9
dan-shexinkum b	SOX9
dan-shexinkum c	SOX9
deoxyneocryptotanshinone	SOX9
C09092	SOX9
manool	SOX9
miltionone Ⅰ	SOX9
NSC 122421	SOX9
Tanshiquinone B	SOX9
Salvinone	SOX9
poricoic acid C	SOX9
2-lauroleic acid	SOX9
LUPENONE	SOX9
NSC63551	SOX9
(R)-linalool	SOX9
dan-shexinkum b	SOX17
dan-shexinkum c	SOX17
deoxyneocryptotanshinone	SOX17
miltionone Ⅰ	SOX17
Tanshiquinone B	SOX17
D-Camphene	SOX15
Hemo-sol	SOX15
alpha-humulene	SOX15
beta-Humulene	SOX15
beta-Selinene	SOX15
beta-caryophyllene	SOX15
γ-elemene	SOX15
alloaromadedrene	SOX15
Squalene	SOX15
EIC	SOX15
beta-Chamigrene	SOX15
(-)-alpha-Pinene	SOX15
()-beta-Pinene	SOX15
beta-Curcumene	SOX15
bulnesene	SOX15
poricoic acid C	SOX15
2-lauroleic acid	SOX15
Stigmasterol	SOX15
(6Z,10E,14E,18E)-2,6,10,15,19,23-hexamethyltetracosa-2,6,10,14,18,22-hexaene	SOX15
dan-shexinkum b	SOSTDC1
dan-shexinkum c	SOSTDC1
deoxyneocryptotanshinone	SOSTDC1
miltionone Ⅰ	SOSTDC1
Tanshiquinone B	SOSTDC1
D-Camphene	SORCS3
Hemo-sol	SORCS3
alpha-humulene	SORCS3
beta-Humulene	SORCS3
beta-Selinene	SORCS3
beta-caryophyllene	SORCS3
γ-elemene	SORCS3
alloaromadedrene	SORCS3
Squalene	SORCS3
beta-Chamigrene	SORCS3
(-)-alpha-Pinene	SORCS3
()-beta-Pinene	SORCS3
beta-Curcumene	SORCS3
bulnesene	SORCS3
gamma-aminobutyric acid	SORCS3
LUPENONE	SORCS3
(S)-Allantoin	SORCS3
NSC63551	SORCS3
Stigmasterol	SORCS3
(6Z,10E,14E,18E)-2,6,10,15,19,23-hexamethyltetracosa-2,6,10,14,18,22-hexaene	SORCS3
2-isopropyl-8-methylphenanthrene-3,4-dione	SOD3
Miltirone	SOD3
daidzein	SOD2
Gulutamine	SOD2
2-isopropyl-8-methylphenanthrene-3,4-dione	SOD2
Miltirone	SOD2
L-Lysin	SOD2
danshensu	SOD1
diosgenin	SOD1
lupeol	SOD1
quercetin	SOD1
rutin	SOD1
2-isopropyl-8-methylphenanthrene-3,4-dione	SOD1
Miltirone	SOD1
(6aR,11aR)-9,10-dimethoxy-6a,11a-dihydro-6H-benzofurano[3,2-c]chromen-3-ol	SOCS1
Mucronulatol	SOCS1
(3R)-3-(2-hydroxy-3,4-dimethoxyphenyl)chroman-7-ol	SOCS1
1,7-Dihydroxy-3,9-dimethoxy pterocarpene	SOCS1
MBOA	SOCS1
isoflavanone	SOAT2
(-)-taxifolin	SOAT2
poriferast-5-en-3beta-ol	SOAT1
Stigmasterol	SOAT1
isoflavanone	SOAT1
(-)-taxifolin	SOAT1
CLR	SOAT1
beta-sitosterol	SOAT1
campest-5-en-3beta-ol	SOAT1
Quercetin-3-O-Galactoside-7-O-Glucoside	SOAT1
campesterol	SOAT1
alpha-Curcumene	SNX3
(+)-alpha-Curcumene	SNX3
α-Amyrin	SNW1
(3S,8S,9S,10R,13R,14S,17R)-10,13-dimethyl-17-[(2R,5S)-5-propan-2-yloctan-2-yl]-2,3,4,7,8,9,11,12,14,15,16,17-dodecahydro-1H-cyclopenta[a]phenanthren-3-ol	SNW1
Poriferasterol	SNW1
poriferast-5-en-3beta-ol	SNW1
α-amyrin	SNW1
gamma-sitosterol	SNW1
Stigmasterol	SNW1
poriferasta-7,22E-dien-3beta-ol	SNW1
ZINC03978781	SNW1
Spinasterol	SNW1
Taraxerol	SNW1
ergosta-7,22E-dien-3beta-ol	SNW1
ergosterol	SNW1
lupeol	SNW1
γ-sitosterol	SNW1
Isofucosterol	SNW1
CLR	SNW1
beta-sitosterol	SNW1
Amyrin	SNW1
campest-5-en-3beta-ol	SNW1
Quercetin-3-O-Galactoside-7-O-Glucoside	SNW1
Sitosterol alpha1	SNW1
isoarborinol	SNW1
sitosterol	SNW1
campesterol	SNW1
D-Camphene	SNTG2
Hemo-sol	SNTG2
alpha-humulene	SNTG2
beta-Humulene	SNTG2
beta-Selinene	SNTG2
beta-caryophyllene	SNTG2
γ-elemene	SNTG2
alloaromadedrene	SNTG2
Squalene	SNTG2
beta-Chamigrene	SNTG2
(-)-alpha-Pinene	SNTG2
()-beta-Pinene	SNTG2
beta-Curcumene	SNTG2
bulnesene	SNTG2
Stigmasterol	SNTG2
(6Z,10E,14E,18E)-2,6,10,15,19,23-hexamethyltetracosa-2,6,10,14,18,22-hexaene	SNTG2
Coixan A	SNRPD3
Coixan A	SNRPD2
Coixan A	SNRPD1
Prolinum	SNRPB2
Coixan A	SNRPA1
Prolinum	SNRPA
Coixan A	SNRPA
Coixan A	SNRNP200
Prolinum	SNCA
EIC	SNCA
2-isopropyl-8-methylphenanthrene-3,4-dione	SNCA
dan-shexinkum b	SNCA
dan-shexinkum c	SNCA
deoxyneocryptotanshinone	SNCA
miltionone Ⅰ	SNCA
Miltirone	SNCA
Tanshiquinone B	SNCA
poricoic acid C	SNCA
2-lauroleic acid	SNCA
LDP	SNCA
α-Amyrin	SNAI2
(3S,8S,9S,10R,13R,14S,17R)-10,13-dimethyl-17-[(2R,5S)-5-propan-2-yloctan-2-yl]-2,3,4,7,8,9,11,12,14,15,16,17-dodecahydro-1H-cyclopenta[a]phenanthren-3-ol	SNAI2
Poriferasterol	SNAI2
poriferast-5-en-3beta-ol	SNAI2
α-amyrin	SNAI2
dan-shexinkum b	SNAI2
dan-shexinkum c	SNAI2
deoxyneocryptotanshinone	SNAI2
miltionone Ⅰ	SNAI2
Tanshiquinone B	SNAI2
gamma-sitosterol	SNAI2
Stigmasterol	SNAI2
poriferasta-7,22E-dien-3beta-ol	SNAI2
ZINC03978781	SNAI2
Spinasterol	SNAI2
Taraxerol	SNAI2
ergosta-7,22E-dien-3beta-ol	SNAI2
ergosterol	SNAI2
lupeol	SNAI2
γ-sitosterol	SNAI2
Isofucosterol	SNAI2
CLR	SNAI2
beta-sitosterol	SNAI2
Amyrin	SNAI2
campest-5-en-3beta-ol	SNAI2
Quercetin-3-O-Galactoside-7-O-Glucoside	SNAI2
Sitosterol alpha1	SNAI2
isoarborinol	SNAI2
sitosterol	SNAI2
campesterol	SNAI2
α-Amyrin	SNAI1
(3S,8S,9S,10R,13R,14S,17R)-10,13-dimethyl-17-[(2R,5S)-5-propan-2-yloctan-2-yl]-2,3,4,7,8,9,11,12,14,15,16,17-dodecahydro-1H-cyclopenta[a]phenanthren-3-ol	SNAI1
Poriferasterol	SNAI1
poriferast-5-en-3beta-ol	SNAI1
α-amyrin	SNAI1
dan-shexinkum b	SNAI1
dan-shexinkum c	SNAI1
deoxyneocryptotanshinone	SNAI1
miltionone Ⅰ	SNAI1
Tanshiquinone B	SNAI1
gamma-sitosterol	SNAI1
Stigmasterol	SNAI1
poriferasta-7,22E-dien-3beta-ol	SNAI1
ZINC03978781	SNAI1
Spinasterol	SNAI1
Taraxerol	SNAI1
ergosta-7,22E-dien-3beta-ol	SNAI1
ergosterol	SNAI1
lupeol	SNAI1
γ-sitosterol	SNAI1
Isofucosterol	SNAI1
CLR	SNAI1
beta-sitosterol	SNAI1
Amyrin	SNAI1
campest-5-en-3beta-ol	SNAI1
Quercetin-3-O-Galactoside-7-O-Glucoside	SNAI1
Sitosterol alpha1	SNAI1
isoarborinol	SNAI1
sitosterol	SNAI1
campesterol	SNAI1
L-Lysin	SMS
Gulutamine	SMPD4
L-Lysin	SMPD4
Gulutamine	SMPD3
L-Lysin	SMPD3
LDP	SMPD1
Gulutamine	SMOX
L-Lysin	SMOX
(+/-)-Isoborneol	SMO
LUPENONE	SMO
cholestanol	SMO
(S)-Allantoin	SMO
NSC63551	SMO
()-Borneol	SMO
dan-shexinkum b	SMAD7
dan-shexinkum c	SMAD7
deoxyneocryptotanshinone	SMAD7
miltionone Ⅰ	SMAD7
tanshinone Ⅵ	SMAD7
Tanshiquinone B	SMAD7
Azelex	SMAD7
myristic acid	SMAD7
Undekansaeure	SMAD7
caprylic acid	SMAD7
lauric acid	SMAD7
palmitic acid	SMAD7
Docosanoate	SMAD7
hexanoic acid	SMAD7
kaempferol	SLPI
Nonanol	SLITRK6
Gulutamine	SLIT3
L-Lysin	SLIT3
Gulutamine	SLIT2
Azelex	SLIT2
myristic acid	SLIT2
Undekansaeure	SLIT2
caprylic acid	SLIT2
lauric acid	SLIT2
palmitic acid	SLIT2
Docosanoate	SLIT2
L-Lysin	SLIT2
hexanoic acid	SLIT2
atractyloside A	SLCO1B3
astragalosideI	SLCO1B3
astragalosideII	SLCO1B3
Isoastragaloside I	SLCO1B3
Isoastragaloside II	SLCO1B3
atractyloside A	SLCO1B1
astragalosideI	SLCO1B1
astragalosideII	SLCO1B1
Isoastragaloside I	SLCO1B1
Isoastragaloside II	SLCO1B1
Nonanol	SLC9A6
alpha-Curcumene	SLC9A3R1
(+)-alpha-Curcumene	SLC9A3R1
LUPENONE	SLC9A3R1
LDP	SLC9A3R1
NSC63551	SLC9A3R1
EIC	SLC9A1
poricoic acid C	SLC9A1
2-lauroleic acid	SLC9A1
EIC	SLC8B1
poricoic acid C	SLC8B1
2-lauroleic acid	SLC8B1
EIC	SLC8A3
poricoic acid C	SLC8A3
2-lauroleic acid	SLC8A3
EIC	SLC8A2
poricoic acid C	SLC8A2
2-lauroleic acid	SLC8A2
EIC	SLC8A1
myristic acid	SLC8A1
METHYL LINOLEATE	SLC8A1
methyl icosa-11,14-dienoate	SLC8A1
3β-hydroxylanosta-7,9(11),24-trien-21-oic acid	SLC8A1
trametenolic acid	SLC8A1
tumulosic acid	SLC8A1
3beta-Hydroxy-24-methylene-8-lanostene-21-oic acid	SLC8A1
poricoic acid C	SLC8A1
hederagenin	SLC8A1
Tumulosic acid	SLC8A1
dehydroeburicoic acid	SLC8A1
2-lauroleic acid	SLC8A1
lauric acid	SLC8A1
Mairin	SLC8A1
NSC63551	SLC8A1
Mandenol	SLC8A1
2-Monoolein	SLC8A1
Gulutamine	SLC7A9
L-Lysin	SLC7A9
Gulutamine	SLC7A8
Istidina	SLC7A8
gamma-aminobutyric acid	SLC7A8
L-Lysin	SLC7A8
Gulutamine	SLC7A7
L-Lysin	SLC7A7
L-Lysin	SLC7A4
Gulutamine	SLC7A4
Prolinum	SLC7A4
Azelex	SLC7A4
myristic acid	SLC7A4
Undekansaeure	SLC7A4
caprylic acid	SLC7A4
lauric acid	SLC7A4
palmitic acid	SLC7A4
gamma-aminobutyric acid	SLC7A4
Docosanoate	SLC7A4
hexanoic acid	SLC7A4
Gulutamine	SLC7A3
Prolinum	SLC7A3
Azelex	SLC7A3
myristic acid	SLC7A3
Undekansaeure	SLC7A3
caprylic acid	SLC7A3
lauric acid	SLC7A3
palmitic acid	SLC7A3
gamma-aminobutyric acid	SLC7A3
Docosanoate	SLC7A3
L-Lysin	SLC7A3
hexanoic acid	SLC7A3
Gulutamine	SLC7A2
Prolinum	SLC7A2
Azelex	SLC7A2
myristic acid	SLC7A2
Undekansaeure	SLC7A2
caprylic acid	SLC7A2
lauric acid	SLC7A2
palmitic acid	SLC7A2
gamma-aminobutyric acid	SLC7A2
Docosanoate	SLC7A2
L-Lysin	SLC7A2
hexanoic acid	SLC7A2
L-Lysin	SLC7A14
Gulutamine	SLC7A11
cis-p-Coumarate	SLC7A11
L-Lysin	SLC7A11
Gulutamine	SLC7A10
L-Lysin	SLC7A10
L-Lysin	SLC7A1
Gulutamine	SLC7A1
Prolinum	SLC7A1
Azelex	SLC7A1
myristic acid	SLC7A1
Undekansaeure	SLC7A1
caprylic acid	SLC7A1
lauric acid	SLC7A1
palmitic acid	SLC7A1
gamma-aminobutyric acid	SLC7A1
Docosanoate	SLC7A1
hexanoic acid	SLC7A1
Gulutamine	SLC6A9
gamma-aminobutyric acid	SLC6A9
betaine	SLC6A9
LDP	SLC6A9
L-Lysin	SLC6A9
EIC	SLC6A8
poricoic acid C	SLC6A8
2-lauroleic acid	SLC6A8
choline	SLC6A8
LDP	SLC6A8
Prolinum	SLC6A7
LDP	SLC6A7
LDP	SLC6A6
Gulutamine	SLC6A5
gamma-aminobutyric acid	SLC6A5
betaine	SLC6A5
LDP	SLC6A5
L-Lysin	SLC6A5
danshenspiroketallactone	SLC6A4
dihydrotanshinlactone	SLC6A4
7-Methoxy-2-methyl isoflavone	SLC6A4
1,2,5,6-tetrahydrotanshinone	SLC6A4
piperlonguminine	SLC6A4
2-methoxyfuranodiene	SLC6A4
przewalskin d	SLC6A4
4-methylenemiltirone	SLC6A4
4-Ethoxycarbonyl-2-quinolone	SLC6A4
Methylenetanshinquinone	SLC6A4
epidanshenspiroketallactone	SLC6A4
przewalskin c	SLC6A4
2-isopropyl-8-methylphenanthrene-3,4-dione	SLC6A4
(+)-alpha-Curcumene	SLC6A4
7-O-methylisomucronulatol	SLC6A4
neocryptotanshinone ii	SLC6A4
formononetin	SLC6A4
salviolone	SLC6A4
beta-sitosterol	SLC6A4
EIC	SLC6A4
dan-shexinkum b	SLC6A4
dan-shexinkum c	SLC6A4
deoxyneocryptotanshinone	SLC6A4
C09092	SLC6A4
miltionone Ⅰ	SLC6A4
Miltirone	SLC6A4
Tanshiquinone B	SLC6A4
poricoic acid C	SLC6A4
2-lauroleic acid	SLC6A4
choline	SLC6A4
LUPENONE	SLC6A4
Astragalus polysaccharide	SLC6A4
LDP	SLC6A4
NSC63551	SLC6A4
neocryptotanshinone ii	SLC6A3
(+)-alpha-Curcumene	SLC6A3
Mucronulatol	SLC6A3
Stigmasterol	SLC6A3
salviolone	SLC6A3
beta-caryophyllene	SLC6A3
4-Ethoxycarbonyl-2-quinolone	SLC6A3
piperlonguminine	SLC6A3
isoferulic acid	SLC6A3
2-methoxyfuranodiene	SLC6A3
7-Methoxy-2-methyl isoflavone	SLC6A3
dihydrotanshinlactone	SLC6A3
atractylone	SLC6A3
2-isopropyl-8-methylphenanthrene-3,4-dione	SLC6A3
Syrigin	SLC6A3
alpha-Curcumene	SLC6A3
1,2,5,6-tetrahydrotanshinone	SLC6A3
Tangshenoside II_qt	SLC6A3
formononetin	SLC6A3
7-O-methylisomucronulatol	SLC6A3
Miltirone	SLC6A3
4-methylenemiltirone	SLC6A3
dan-shexinkum b	SLC6A3
przewalskin d	SLC6A3
choline	SLC6A3
Astragalus polysaccharide	SLC6A3
LDP	SLC6A3
(+/-)-Isoborneol	SLC6A2
beta-caryophyllene	SLC6A2
()-beta-Pinene	SLC6A2
Stigmasterol	SLC6A2
alpha-Curcumene	SLC6A2
hederagenin	SLC6A2
Syrigin	SLC6A2
beta-Humulene	SLC6A2
kaempferol	SLC6A2
Tangshenoside II_qt	SLC6A2
Cymol	SLC6A2
przewalskin d	SLC6A2
atractylone	SLC6A2
(R)-linalool	SLC6A2
(+)-alpha-Curcumene	SLC6A2
()-Borneol	SLC6A2
γ-elemene	SLC6A2
beta-Chamigrene	SLC6A2
EIC	SLC6A2
beta-Selinene	SLC6A2
salviolone	SLC6A2
przewalskin c	SLC6A2
Scopoletol	SLC6A2
alpha-humulene	SLC6A2
Gaidic acid	SLC6A2
PENTYLFURAN	SLC6A2
choline	SLC6A2
Astragalus polysaccharide	SLC6A2
LDP	SLC6A2
Prolinum	SLC6A14
LDP	SLC6A14
Gulutamine	SLC6A13
LDP	SLC6A13
L-Lysin	SLC6A13
Gulutamine	SLC6A12
LDP	SLC6A12
L-Lysin	SLC6A12
Gulutamine	SLC6A11
LDP	SLC6A11
L-Lysin	SLC6A11
gamma-aminobutyric acid	SLC6A1
Gulutamine	SLC6A1
LDP	SLC6A1
L-Lysin	SLC6A1
C09092	SLC5A7
Diop	SLC5A7
choline	SLC5A7
apigenin	SLC5A5
Flavaxin	SLC52A3
atractyloside A	SLC47A1
astragalosideI	SLC47A1
astragalosideII	SLC47A1
Isoastragaloside I	SLC47A1
Isoastragaloside II	SLC47A1
FA	SLC46A1
C09092	SLC44A4
Diop	SLC44A4
Nonanol	SLC44A4
gamma-aminobutyric acid	SLC44A4
choline	SLC44A4
LUPENONE	SLC44A4
(S)-Allantoin	SLC44A4
NSC63551	SLC44A4
EIC	SLC3A2
poricoic acid C	SLC3A2
2-lauroleic acid	SLC3A2
Gulutamine	SLC3A1
L-Lysin	SLC3A1
Gulutamine	SLC38A7
Istidina	SLC38A7
Azelex	SLC38A7
myristic acid	SLC38A7
Undekansaeure	SLC38A7
caprylic acid	SLC38A7
lauric acid	SLC38A7
palmitic acid	SLC38A7
Docosanoate	SLC38A7
L-Lysin	SLC38A7
hexanoic acid	SLC38A7
Gulutamine	SLC38A3
Istidina	SLC38A3
2-isopropyl-8-methylphenanthrene-3,4-dione	SLC38A3
Miltirone	SLC38A3
gamma-aminobutyric acid	SLC38A3
L-Lysin	SLC38A3
Gulutamine	SLC36A3
L-Lysin	SLC36A3
Gulutamine	SLC36A2
L-Lysin	SLC36A2
Gulutamine	SLC36A1
gamma-aminobutyric acid	SLC36A1
betaine	SLC36A1
L-Lysin	SLC36A1
EIC	SLC35G1
poricoic acid C	SLC35G1
2-lauroleic acid	SLC35G1
Gulutamine	SLC32A1
gamma-aminobutyric acid	SLC32A1
betaine	SLC32A1
L-Lysin	SLC32A1
quercetin	SLC2A4
luteolin	SLC2A4
kaempferol	SLC2A4
apigenin	SLC2A4
CLR	SLC2A2
(6aR,11aR)-9,10-dimethoxy-6a,11a-dihydro-6H-benzofurano[3,2-c]chromen-3-ol	SLC2A1
Mucronulatol	SLC2A1
(3R)-3-(2-hydroxy-3,4-dimethoxyphenyl)chroman-7-ol	SLC2A1
1,7-Dihydroxy-3,9-dimethoxy pterocarpene	SLC2A1
MBOA	SLC2A1
Nonanol	SLC29A2
quercetin	SLC29A2
LDP	SLC29A2
Nonanol	SLC29A1
quercetin	SLC29A1
LDP	SLC29A1
Gulutamine	SLC28A3
Nonanol	SLC28A3
L-Lysin	SLC28A3
Gulutamine	SLC28A1
L-Lysin	SLC28A1
Gulutamine	SLC26A6
LUPENONE	SLC26A6
L-Lysin	SLC26A6
NSC63551	SLC26A6
poriferast-5-en-3beta-ol	SLC25A6
Stigmasterol	SLC25A6
beta-sitosterol	SLC25A6
Quercetin-3-O-Galactoside-7-O-Glucoside	SLC25A6
Gulutamine	SLC25A5
poriferast-5-en-3beta-ol	SLC25A5
Stigmasterol	SLC25A5
L-Lysin	SLC25A5
beta-sitosterol	SLC25A5
Quercetin-3-O-Galactoside-7-O-Glucoside	SLC25A5
Gulutamine	SLC25A4
poriferast-5-en-3beta-ol	SLC25A4
Stigmasterol	SLC25A4
L-Lysin	SLC25A4
beta-sitosterol	SLC25A4
campest-5-en-3beta-ol	SLC25A4
Quercetin-3-O-Galactoside-7-O-Glucoside	SLC25A4
campesterol	SLC25A4
FA	SLC25A32
caprylic acid	SLC25A29
palmitic acid	SLC25A29
gamma-aminobutyric acid	SLC25A29
choline	SLC25A29
caprylic acid	SLC25A20
palmitic acid	SLC25A20
gamma-aminobutyric acid	SLC25A20
choline	SLC25A20
Gulutamine	SLC25A2
Prolinum	SLC25A2
gamma-aminobutyric acid	SLC25A2
L-Lysin	SLC25A2
Gulutamine	SLC25A15
Prolinum	SLC25A15
gamma-aminobutyric acid	SLC25A15
L-Lysin	SLC25A15
Gulutamine	SLC25A13
Azelex	SLC25A13
myristic acid	SLC25A13
Undekansaeure	SLC25A13
caprylic acid	SLC25A13
lauric acid	SLC25A13
palmitic acid	SLC25A13
gamma-aminobutyric acid	SLC25A13
choline	SLC25A13
Docosanoate	SLC25A13
L-Lysin	SLC25A13
hexanoic acid	SLC25A13
Gulutamine	SLC25A12
Azelex	SLC25A12
myristic acid	SLC25A12
Undekansaeure	SLC25A12
caprylic acid	SLC25A12
lauric acid	SLC25A12
palmitic acid	SLC25A12
gamma-aminobutyric acid	SLC25A12
choline	SLC25A12
Docosanoate	SLC25A12
L-Lysin	SLC25A12
hexanoic acid	SLC25A12
Azelex	SLC25A10
myristic acid	SLC25A10
Undekansaeure	SLC25A10
caprylic acid	SLC25A10
lauric acid	SLC25A10
palmitic acid	SLC25A10
Docosanoate	SLC25A10
hexanoic acid	SLC25A10
Azelex	SLC25A1
myristic acid	SLC25A1
Undekansaeure	SLC25A1
caprylic acid	SLC25A1
lauric acid	SLC25A1
palmitic acid	SLC25A1
Docosanoate	SLC25A1
hexanoic acid	SLC25A1
LDP	SLC22A8
Gulutamine	SLC22A6
FA	SLC22A6
LDP	SLC22A6
L-Lysin	SLC22A6
caprylic acid	SLC22A5
palmitic acid	SLC22A5
gamma-aminobutyric acid	SLC22A5
choline	SLC22A5
caprylic acid	SLC22A4
palmitic acid	SLC22A4
gamma-aminobutyric acid	SLC22A4
choline	SLC22A4
LDP	SLC22A3
LDP	SLC22A2
LDP	SLC22A11
alpha-Curcumene	SLC22A1
(+)-alpha-Curcumene	SLC22A1
Astragalus polysaccharide	SLC22A1
LDP	SLC22A1
Gulutamine	SLC1A6
Azelex	SLC1A6
myristic acid	SLC1A6
Undekansaeure	SLC1A6
caprylic acid	SLC1A6
lauric acid	SLC1A6
palmitic acid	SLC1A6
Docosanoate	SLC1A6
L-Lysin	SLC1A6
hexanoic acid	SLC1A6
Gulutamine	SLC1A5
Istidina	SLC1A5
gamma-aminobutyric acid	SLC1A5
L-Lysin	SLC1A5
Gulutamine	SLC1A4
Istidina	SLC1A4
gamma-aminobutyric acid	SLC1A4
L-Lysin	SLC1A4
Gulutamine	SLC1A3
Azelex	SLC1A3
myristic acid	SLC1A3
Undekansaeure	SLC1A3
caprylic acid	SLC1A3
lauric acid	SLC1A3
palmitic acid	SLC1A3
Docosanoate	SLC1A3
L-Lysin	SLC1A3
hexanoic acid	SLC1A3
Gulutamine	SLC1A2
L-Lysin	SLC1A2
Gulutamine	SLC1A1
gamma-aminobutyric acid	SLC1A1
choline	SLC1A1
L-Lysin	SLC1A1
Gulutamine	SLC19A3
Istidina	SLC19A3
L-Lysin	SLC19A3
[truncated: 13,042 more rows]
